# Supplementary material for: Vibrational spectrum and molecular structure of triphenylamine monomer: A combined matrix-isolation FTIR and theoretical study
Source: Royal Society of Chemistry journal article supplement (doi:10.1039/b306489a), 2003-01-01
Supplement: esi-1.pdf [file esi-1.pdf]

**Electronic Supporting Information (Part 1).**

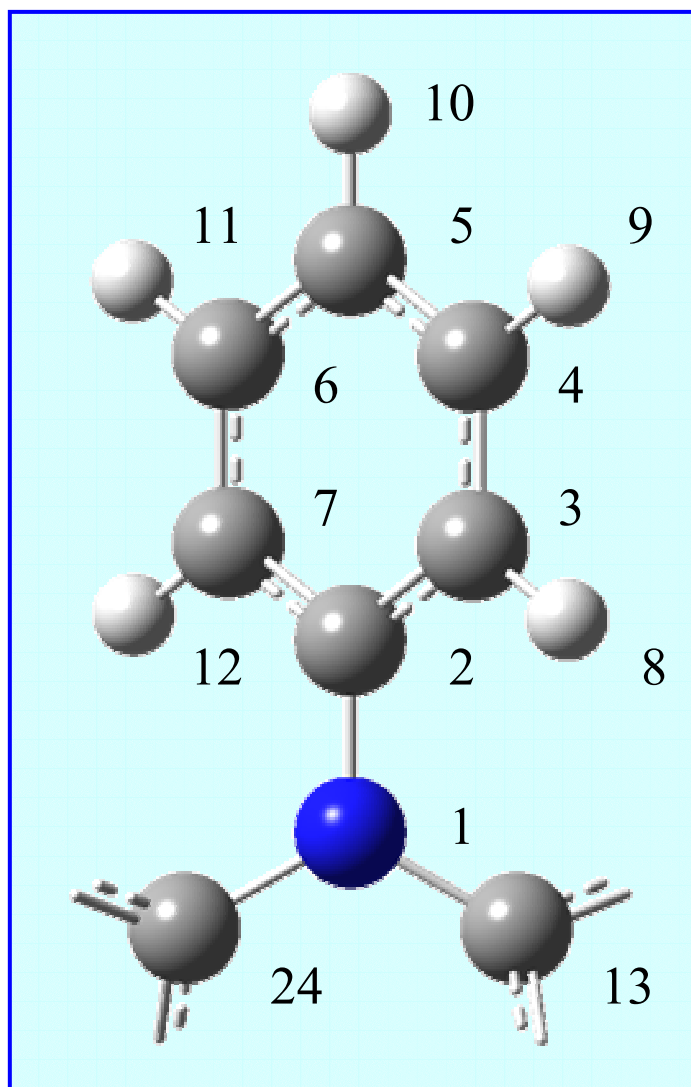

**Figure S1.**

Atom numbering for one of the phenyl rings in the molecule of triphenylamine, as used in Table S1. The other two phenyl rings are identical by symmetry.

**Table S1.**

Optimized geometry parameters for one of the phenyl rings and the central NCCC fragment of the triphenylamine monomer. Other two phenyl rings are identical by symmetry. For atom numbering see Figure S1.

| Definition               | Value    |             |
|--------------------------|----------|-------------|
|                          | 6-31G**  | aug-cc-pVDZ |
| Bond lengths (Angstroms) |          |             |
| R(1,2)                   | 1.4216   | 1.4211      |
| R(1,13)                  | 1.4216   | 1.4211      |
| R(1,24)                  | 1.4216   | 1.4211      |
| R(2,3)                   | 1.4044   | 1.4058      |
| R(2,7)                   | 1.4044   | 1.4058      |
| R(3,4)                   | 1.3933   | 1.3961      |
| R(3,8)                   | 1.0848   | 1.0889      |
| R(4,5)                   | 1.3962   | 1.3991      |
| R(4,9)                   | 1.0863   | 1.0906      |
| R(5,6)                   | 1.3962   | 1.3991      |
| R(5,10)                  | 1.0856   | 1.0899      |
| R(6,7)                   | 1.3933   | 1.3961      |
| R(6,11)                  | 1.0863   | 1.0906      |
| R(7,12)                  | 1.0848   | 1.0889      |
| Bond angles (Degrees)    |          |             |
| A(2,1,13)                | 120.0    | 120.0       |
| A(2,1,24)                | 120.0    | 120.0       |
| A(13,1,24)               | 120.0    | 120.0       |
| A(1,2,3)                 | 120.5345 | 120.5261    |
| A(1,2,7)                 | 120.5345 | 120.5261    |
| A(3,2,7)                 | 118.9309 | 118.9478    |
| A(2,3,4)                 | 120.3108 | 120.3394    |
| A(2,3,8)                 | 119.3902 | 119.5709    |
| A(4,3,8)                 | 120.299  | 120.0896    |
| A(3,4,5)                 | 120.6234 | 120.6093    |
| A(3,4,9)                 | 119.2825 | 119.3463    |
| A(5,4,9)                 | 120.0881 | 120.0393    |
| A(4,5,6)                 | 119.1916 | 119.1488    |
| A(4,5,10)                | 120.4042 | 120.4256    |
| A(6,5,10)                | 120.4042 | 120.4256    |
| A(5,6,7)                 | 120.6234 | 120.6093    |
| A(5,6,11)                | 120.0881 | 120.0393    |
| A(7,6,11)                | 119.2825 | 119.3463    |
| A(2,7,6)                 | 120.3108 | 120.3394    |
| A(2,7,12)                | 119.3902 | 119.5709    |
| A(6,7,12)                | 120.299  | 120.0896    |

**Table S1 (continued).**

Dihedral angles (Degrees)

|              |           |           |
|--------------|-----------|-----------|
| D(13,1,2,3)  | -41.5041  | -41.9752  |
| D(13,1,2,7)  | 138.4959  | 138.0248  |
| D(24,1,2,3)  | 138.4959  | 138.0248  |
| D(24,1,2,7)  | -41.5041  | -41.9752  |
| D(1,2,3,4)   | 179.5529  | 179.6351  |
| D(1,2,3,8)   | -0.3867   | -0.2287   |
| D(7,2,3,4)   | -0.4471   | -0.3649   |
| D(7,2,3,8)   | 179.6133  | 179.7713  |
| D(1,2,7,6)   | 179.5529  | 179.6351  |
| D(1,2,7,12)  | -0.3867   | -0.2287   |
| D(3,2,7,6)   | -0.4471   | -0.3649   |
| D(3,2,7,12)  | 179.6133  | 179.7713  |
| D(2,3,4,5)   | 0.9017    | 0.7358    |
| D(2,3,4,9)   | -179.9943 | 179.9149  |
| D(8,3,4,5)   | -179.1592 | -179.4011 |
| D(8,3,4,9)   | -0.0553   | -0.222    |
| D(3,4,5,6)   | -0.4505   | -0.3673   |
| D(3,4,5,10)  | 179.5495  | 179.6327  |
| D(9,4,5,6)   | -179.5473 | -179.5407 |
| D(9,4,5,10)  | 0.4527    | 0.4593    |
| D(4,5,6,7)   | -0.4505   | -0.3673   |
| D(4,5,6,11)  | -179.5473 | -179.5407 |
| D(10,5,6,7)  | 179.5495  | 179.6327  |
| D(10,5,6,11) | 0.4527    | 0.4593    |
| D(5,6,7,2)   | 0.9017    | 0.7358    |
| D(5,6,7,12)  | -179.1592 | -179.4011 |
| D(11,6,7,2)  | -179.9943 | 179.9149  |
| D(11,6,7,12) | -0.0553   | -0.222    |

---

---

Dipole moment = 0 Debye (Full point group  $D_3$ )

Standard basis 6-31G\*\*. Rotational constants (GHZ):

0.4002826      0.4002826      0.2203502

Standard basis Aug-CC-pVDZ. Rotational constants (GHZ):

0.3991689      0.3991689      0.2201991

**Table S2.**

Calculated frequencies ( $\text{cm}^{-1}$ ) of the non-infrared-active modes (symmetry  $A_1$ , theoretical intensities are equal to zero) in the TPA monomer.

| DFT (B3LYP) |             | Description and<br>(Whiffen symbol) |
|-------------|-------------|-------------------------------------|
| 6-31G**     | aug-cc-pVDZ |                                     |
| 79.3        | 79.7        | change of blade pitch               |
| 279.7       | 279.6       | N-Phenyl stretching                 |
| 417.4       | 417.9       | R tors (w)                          |
| 712.8       | 714.1       | R bend (t)                          |
| 833.1       | 828.3       | CH oop (g)                          |
| 949.9       | 962.7       | CH oop (h)                          |
| 991.8       | 992.5       | R bend (p)                          |
| 1031.0      | 1029.5      | CH bend (b)                         |
| 1174.0      | 1170.2      | CH bend (a), CN str                 |
| 1189.1      | 1187.6      | CH bend (a), CN str                 |
| 1504.5      | 1492.6      | R str (m), CH bend (b)              |
| 1626.9      | 1624.5      | R str (k)                           |
| 3110.3      | 3127.6      | CH str                              |
| 3133.3      | 3150.0      | CH str                              |
| 3143.9      | 3159.8      | CH str                              |

Theoretical frequencies calculated with the 6-31G\*\* basis set were scaled with a factor of 0.978, and those calculated with the aug-cc-pVDZ basis set were scaled by 0.986.  
Str – stretching, bend – bending, oop – out-of-plane, tors – torsion.
